# Supplementary material for: A Review of the Burden of Trauma Pain in Emergency Settings in Europe
Source: Springer Nature journal article supplement (doi:10.1007/s40122-018-0101-1), 2018-06-02
Supplement: MOESM1 [file 15814324]

# SUPPLEMENTARY MATERIAL

**Supplementary Table 1.** Publications identified from the primary literature search.

| Author and title                                                                                                                                                         | Publication year | Country  | Study type                       | Study details                                                                                                                                                                                                             |
|--------------------------------------------------------------------------------------------------------------------------------------------------------------------------|------------------|----------|----------------------------------|---------------------------------------------------------------------------------------------------------------------------------------------------------------------------------------------------------------------------|
| <b>Observational patient assessment</b>                                                                                                                                  |                  |          |                                  |                                                                                                                                                                                                                           |
| <b>Boccard <i>et al.</i> [7]</b><br>Pain management in adult patients in emergency care units in France in 2010                                                          | 2011             | France   | Observational, multicenter study | HCP assessment of patient pain and subsequent management in the ED (n=1,352).                                                                                                                                             |
| <b>Butti <i>et al.</i> [20]</b><br>Evaluation of the effectiveness and efficacy of the triage emergency department nursing protocol for the management of pain           | 2017             | Italy    | Prospective, observational study | The impact of a triage protocol on time to analgesia and patient satisfaction was assessed in individuals attending the ED with moderate-to-severe pain not requiring surgical intervention (n=382; 55% had trauma pain). |
| <b>Carreira <i>et al.</i> [18]</b><br>How pain is treated in an emergency department in a central hospital? A prospective study                                          | 2012             | Portugal | Prospective, observational study | Analysis of the type of analgesia, time to analgesia prescription and time to analgesia administration were recorded for patients presenting with acute pain at the ED (n=420).                                           |
| <b>Kone <i>et al.</i> [59]</b><br>Impact of a pilot team on patients' pain reduction and satisfaction in an emergency department: a before-and-after observational study | 2016             | France   | Cross-sectional, patient survey  | Assessment of the impact of a pain management protocol through the use of two patient surveys on pain reduction and patient satisfaction.                                                                                 |

| Author and title                                                                                                                                                             | Publication year | Country        | Study type                             | Study details                                                                                                                                                               |
|------------------------------------------------------------------------------------------------------------------------------------------------------------------------------|------------------|----------------|----------------------------------------|-----------------------------------------------------------------------------------------------------------------------------------------------------------------------------|
| <b>Marinangeli <i>et al.</i> [30]</b><br>Acute pain and availability of analgesia in the prehospital emergency setting in Italy: a problem to be solved                      | 2009             | Italy          | Observational, patient cohort study    | HCP assessment of patient pain in pre-hospital settings and questionnaire on the availability of analgesics in ambulances.                                                  |
| <b>Mura <i>et al.</i> [10]</b><br>Prospective study on prevalence, intensity, type and therapy of acute pain in a second-level urban emergency department                    | 2017             | Italy          | Prospective, observational study       | Assessment of the prevalence and intensity of pain in patients attending a hospital ED (n=2,838; pain due to traumatic events in 40%).                                      |
| <b>Oberholzer <i>et al.</i> [12]</b><br>Factors influencing quality of pain management in a physician staffed helicopter emergency medical service                           | 2017             | Switzerland    | Retrospective observational study      | Analysis of modifiable factors that influence analgesia in patients with moderate/severe pain receiving prehospital emergency treatment (n=778; pain due to trauma in 69%). |
| <b>Vidouris <i>et al.</i> [15]</b><br>To block or not to block? The utilisation of regional anaesthesia on the trauma list in a London major trauma centre                   | 2016             | United Kingdom | Prospective observational study        | Audit of the use of regional anesthesia in trauma patients attending a hospital ED (n=51).                                                                                  |
| <b>Randomized controlled trial</b>                                                                                                                                           |                  |                |                                        |                                                                                                                                                                             |
| <b>Coffey <i>et al.</i> [36]</b><br>STOP!: a randomised, double-blind, placebo-controlled study of the efficacy and safety of methoxyflurane for the treatment of acute pain | 2014             | United Kingdom | Double-blind, placebo-controlled trial | Investigation of the efficacy and safety of low-dose methoxyflurane vs placebo in adults and adolescents with moderate pain due to minor trauma (n=298).                    |

| Author and title                                                                                                                                                                                          | Publication year | Country         | Study type                                  | Study details                                                                                                                                                        |
|-----------------------------------------------------------------------------------------------------------------------------------------------------------------------------------------------------------|------------------|-----------------|---------------------------------------------|----------------------------------------------------------------------------------------------------------------------------------------------------------------------|
| <b>Coffey <i>et al.</i> [37]</b><br>Methoxyflurane analgesia in adult patients in the emergency department: a subgroup analysis of a randomized, double-blind, placebo-controlled study (STOP!)           | 2016             | United Kingdom  | Double-blind, placebo-controlled trial      | Investigation of the efficacy and safety of low-dose methoxyflurane vs placebo in adults (subanalysis) with moderate pain due to minor trauma (n=204).               |
| <b>Coffey <i>et al.</i> [39]</b><br>The duration of methoxyflurane analgesia in adult patients in the emergency department: a sub-analysis of STOP!, a randomised, double-blind, placebo-controlled study | 2017             | United Kingdom  | Double-blind, placebo-controlled trial      | Investigation of the duration of pain control provided by low-dose methoxyflurane vs placebo in adults (subanalysis) with moderate pain due to minor trauma (n=203). |
| <b>Dissmann <i>et al.</i> [38]</b><br>Global medication performance and safety of methoxyflurane analgesia in adult patients with contusions and lacerations treated in the emergency department          | 2017             | United Kingdom  | Double-blind, placebo-controlled trial      | Investigation of the efficacy and safety of low-dose methoxyflurane vs placebo in adults (subanalysis) with moderate pain due to contusions and lacerations (n=60).  |
| <b>Ridderikhof <i>et al.</i> [22]</b><br>Acetaminophen or nonsteroidal anti-inflammatory drugs in acute musculoskeletal trauma: a multicenter, double-blind randomized clinical trial                     | 2018             | The Netherlands | Prospective, double-blind, randomized study | Comparison of acetaminophen, diclofenac and combination therapy for pain associated with minor musculoskeletal trauma (n=282).                                       |
| <b>Literature review</b>                                                                                                                                                                                  |                  |                 |                                             |                                                                                                                                                                      |

| Author and title                                                                                                                                                                 | Publication year | Country        | Study type                     | Study details                                                                                                                                       |
|----------------------------------------------------------------------------------------------------------------------------------------------------------------------------------|------------------|----------------|--------------------------------|-----------------------------------------------------------------------------------------------------------------------------------------------------|
| <b>Andrade et al. [27]</b><br>Safety of metamizole: a systematic review of the literature                                                                                        | 2016             | Germany        | Systematic literature review   | Systematic review of adverse outcomes associated with metamizole (22 studies across a range of settings).                                           |
| <b>Berben et al. [3]</b><br>Prevalence and relief of pain in trauma patients in emergency medical services                                                                       | 2011             | Netherlands    | Retrospective, document review | Assessment of the prevalence of pain in pre-hospital emergency settings (n=1,407).                                                                  |
| <b>Blair et al. [35]</b><br>Methoxyflurane inhalation vapour in trauma pain: a profile of its use in the EU                                                                      | 2017             | Europe         | Literature review              | Commentary review of the efficacy, safety and current clinical positioning of methoxyflurane.                                                       |
| <b>Dayan et al. [33]</b><br>Analgesic use of inhaled methoxyflurane: evaluation of its potential nephrotoxicity                                                                  | 2016             | United Kingdom | Literature review              | Commentary review of the renal safety profile of low-dose methoxyflurane                                                                            |
| <b>Keene et al. [28]</b><br>Acute pain management in trauma                                                                                                                      | 2011             | United Kingdom | Literature review              | Commentary review of the epidemiology of trauma pain and methods for administering pain relief in emergency settings.                               |
| <b>Parker et al. [5]</b><br>Management of pain in pre-hospital settings                                                                                                          | 2015             | United Kingdom | Literature review              | Commentary review of methods of assessing trauma pain and the undertreatment of pain in emergency settings.                                         |
| <b>Porter et al. [34]</b><br>Management of trauma pain in the emergency setting: low dose methoxyflurane or nitrous oxide? A systematic review and indirect treatment comparison | 2018             | United Kingdom | Literature review              | Systematic review comparing the efficacy and safety of methoxyflurane and N <sub>2</sub> O for acute trauma pain in emergency settings (2 studies). |

| Author and title                                                                                                                     | Publication year | Country        | Study type                 | Study details                                                                                                                                                                                             |
|--------------------------------------------------------------------------------------------------------------------------------------|------------------|----------------|----------------------------|-----------------------------------------------------------------------------------------------------------------------------------------------------------------------------------------------------------|
| <b>Roberts <i>et al.</i> [48]</b><br>Paracetamol: not as safe as we thought? A systematic literature review of observational studies | 2016             | United Kingdom | Literature review          | Systematic review of the safety of paracetamol based on observational studies across a range of settings (8 studies).                                                                                     |
| <b>Patient chart review</b>                                                                                                          |                  |                |                            |                                                                                                                                                                                                           |
| <b>Dale <i>et al.</i> [11]</b><br>Assessment of pain in a Norwegian emergency department                                             | 2015             | Norway         | Patient record review      | Analysis of data on initial assessment and treatment of trauma pain patients in the ED (n=764).                                                                                                           |
| <b>Dilworth <i>et al.</i> [62]</b><br>Management of acute pain in adults attending an emergency department: a closed loop audit      | 2017             | Ireland        | Patient record review      | Evaluation of analgesia administration in accordance with Royal College of Emergency Medicine Guidelines, and the impact of a subsequent awareness campaign on pain management within a single ED (n≤64). |
| <b>Friesgaard <i>et al.</i> [41]</b><br>Efficacy and safety of intravenous fentanyl administered by ambulance personnel              | 2016             | Denmark        | Patient record review      | Review of patient medical charts treated with IV fentanyl for pain in the ambulance (n=2,348).                                                                                                            |
| <b>Karwowski-Soulie <i>et al.</i> [4]</b><br>Pain in an emergency department: an audit                                               | 2006             | France         | Prospective, cohort review | Assessment of patient pain intensity at arrival and discharge from the ED (n=726).                                                                                                                        |
| <b>Hebsgaard <i>et al.</i> [31]</b><br>Assessment of acute pain in trauma: a retrospective prehospital evaluation                    | 2016             | Denmark        | Patient record review      | Assessment of analgesic use in trauma patients attending a mobile emergency care unit (n=985).                                                                                                            |

| Author and title                                                                                                                                                                                        | Publication year | Country                                                        | Study type            | Study details                                                                                                                                                            |
|---------------------------------------------------------------------------------------------------------------------------------------------------------------------------------------------------------|------------------|----------------------------------------------------------------|-----------------------|--------------------------------------------------------------------------------------------------------------------------------------------------------------------------|
| <b>Scharonow <i>et al.</i> [66]</b><br>Project for the introduction of prehospital analgesia with fentanyl and morphine administered by specially trained paramedics in a rural service area of Germany | 2017             | Germany                                                        | Patient record review | Audit of emergency medical service call-out data documenting the safety and efficacy of prehospital opioid administration (n=77; 69% had trauma pain).                   |
| <b>Singh <i>et al.</i> [16]</b><br>Audit of fascia iliaca blocks for hip fracture patients in Sunderland A&E                                                                                            | 2017             | United Kingdom                                                 | Patient record review | Audit of the proportion of hip fracture patients receiving fascia iliaca blocks over a 6-month period (National Hip Fracture Database).                                  |
| <b>Xia <i>et al.</i> [60]</b><br>Pre-hospital pain relief treatment in patients with musculoskeletal injuries experiencing moderate to severe pain in medical emergencies                               | 2017             | Belgium, France, Germany, Italy, Spain, Sweden (and Australia) | Patient chart review  | Assessment of pain relief treatments, timelines and outcomes associated with paramedic care (n=856).                                                                     |
| <b>Guideline</b>                                                                                                                                                                                        |                  |                                                                |                       |                                                                                                                                                                          |
| <b>Tamches <i>et al.</i> [19]</b><br>Acute pain in adults admitted to the emergency room: development and implementation of abbreviated guidelines                                                      | 2007             | Switzerland                                                    | Local guideline       | Development and implementation of a clinical practice guideline for treating acute pain in the ED.                                                                       |
| <b>HCP questionnaire</b>                                                                                                                                                                                |                  |                                                                |                       |                                                                                                                                                                          |
| <b>Berben <i>et al.</i> [53]</b><br>Facilitators and barriers in pain management for trauma patients in the chain of emergency care                                                                     | 2012             | Netherlands                                                    | HCP interviews        | Qualitative interviews (n=10) and focus groups (n=5) of HCPs working in ambulances and EDs to discuss the management of patients with trauma pain in emergency settings. |

ED, emergency department; HCP, healthcare professional; IV, intravenous

**Supplementary Table 2.** Publications identified from the grey literature search.

| Author and title                                                                                                                                          | Publication year | Country                                                           | Study type                                     | Study details                                                                                                                              |
|-----------------------------------------------------------------------------------------------------------------------------------------------------------|------------------|-------------------------------------------------------------------|------------------------------------------------|--------------------------------------------------------------------------------------------------------------------------------------------|
| <b>Literature review</b>                                                                                                                                  |                  |                                                                   |                                                |                                                                                                                                            |
| <b>Hansen <i>et al.</i> [45]</b><br>Limited evidence for intranasal fentanyl in the emergency department and the prehospital setting: a systematic review | 2013             | Denmark                                                           | Systematic literature review                   | Review of studies (n=12) assessing the use of IN fentanyl in the pre-hospital and ED settings.                                             |
| <b>Jasiecka <i>et al.</i> [26]</b><br>Pharmacological characteristics of metamizole                                                                       | 2014             | Poland                                                            | Literature review                              | Commentary style review of literature reporting on the pharmacokinetics, mechanism of action and clinical applications of metamizole.      |
| <b>Jonkman <i>et al.</i> [32]</b><br>Ketamine for pain                                                                                                    | 2017             | The Netherlands                                                   | Literature review                              | Review of narrative and systematic reviews (n=29) assessing the safety and efficacy of ketamine across a range of settings.                |
| <b>Kotter <i>et al.</i> [25]</b><br>Metamizole-associated adverse events: a systematic review and meta-analysis                                           | 2015             | Germany                                                           | Systematic literature review and meta-analysis | Review of studies (n=79) assessing the safety of metamizole compared with placebo and other analgesics, across a range of settings.        |
| <b>Martini <i>et al.</i> [67]</b><br>Pharmacokinetic–pharmacodynamic modeling in acute and chronic pain: an overview of the recent literature             | 2011             | The Netherlands                                                   | Literature review                              | Analysis of literature on the pharmacokinetics of analgesia and how this can affect pain management strategies for acute and chronic pain. |
| <b>Pergolizzi <i>et al.</i> [29]</b><br>Tramadol/paracetamol fixed-dose combination in the treatment of moderate to severe pain                           | 2012             | The Netherlands, France, UK, Switzerland, Spain, Ireland (and US) | Expert opinion review                          | Review of the literature and report from a consensus meeting of pain management experts.                                                   |
| <b>Observational patient assessment</b>                                                                                                                   |                  |                                                                   |                                                |                                                                                                                                            |



| Author and title                                                                                                                                          | Publication year | Country         | Study type                                  | Study details                                                                                                                    |
|-----------------------------------------------------------------------------------------------------------------------------------------------------------|------------------|-----------------|---------------------------------------------|----------------------------------------------------------------------------------------------------------------------------------|
| <b>Steiner <i>et al.</i> [61]</b><br>Performance of the Manchester Triage System in adult medical emergency patients: a prospective cohort study          | 2016             | Switzerland     | Prospective, observational study            | Regression model analysis of patients triaged in the ED (n=2,407) to determine treatment priority.                               |
| <b>Stephan <i>et al.</i> [14]</b><br>Pain in the emergency department: adherence to an implemented treatment protocol                                     | 2010             | Switzerland     | Prospective, patient chart review           | Review of patient charts (n=337) to determine adherence to the pain management protocol in the ED.                               |
| <b>Van Woerden <i>et al.</i> [9]</b><br>Increased analgesia administration in emergency medicine after implementation of revised guidelines               | 2016             | The Netherlands | Prospective, patient cohort study           | Review of patient's (n=2,107) pain scores prior to and post-implementation of a revised guideline for pain management in the ED. |
| <b>Randomized, controlled trial</b>                                                                                                                       |                  |                 |                                             |                                                                                                                                  |
| <b>Ducasse <i>et al.</i> [23]</b><br>Nitrous oxide for early analgesia in the emergency setting: a randomized, double blind multicenter prehospital trial | 2013             | France          | Prospective, double-blind, randomized study | Assessment of the efficacy of N <sub>2</sub> O in the treatment of patients with acute trauma pain in the ED (n=60).             |
| <b>Patient information webpage</b>                                                                                                                        |                  |                 |                                             |                                                                                                                                  |
| <b>NHS Choices [21]</b><br>NSAIDs                                                                                                                         | 2016             | United Kingdom  | Website                                     | Patient information website detailing the types and side effects of NSAIDs.                                                      |
| <b>NHS Choices [47]</b><br>Paracetamol for adults                                                                                                         | 2014             | United Kingdom  | Website                                     | Patient information website detailing the types and side effects of paracetamol.                                                 |
| <b>Guideline</b>                                                                                                                                          |                  |                 |                                             |                                                                                                                                  |
| <b>The College of Emergency Medicine [8]</b><br>Management of pain in adults                                                                              | 2014             | UK              | Local guideline                             | Recommendations for assessing pain and administering analgesia in the ED                                                         |

ED, emergency department; HCP, healthcare professional; IN, intranasal; NSAID, nonsteroidal anti-inflammatory
